# Supplementary material
Source: MDPI journal article supplement (https://www.mdpi.com/2077-1312/5/4/46)
Supplement: s1 [file s1]

## Supplement Note 1 Temperature-correction procedure for oxygen microelectrode data

The O<sub>2</sub> microelectrode OX-50 was calibrated at one specific temperature. However, the water temperature within the test tubes during oxygen readings might be different from that calibration temperature. Therefore, the O<sub>2</sub> data had to be temperature-corrected. This was done by recording the temperature-dependent signal of the O<sub>2</sub> sensor (in mV), which is related to the temperature-dependent O<sub>2</sub> saturation of the sea water.

The sensor-specific O<sub>2</sub>-temperature curve was recorded using the Logger software from SensorTraceSuite (Unisense, Denmark). The OX-50 and TP-200 electrodes were submerged in chilled, air-saturated seawater that was constantly warmed up to room temperature. From the linear fit of the O<sub>2</sub>-temperature curve the slope was used for following calculations: (1) For each test tube, the difference between the mean in situ temperature, as retrieved from temperature measurements in the surrounding water bath during experimental O<sub>2</sub> readings, and the temperature from the calibration was calculated, i.e.  $\Delta T$ . (2)  $\Delta T$  was multiplied with the slope from the O<sub>2</sub>-temperature curve yielding  $\Delta O_2$  (in mV). (3) This  $\Delta O_2$  value was added to the initial mean mV signal obtained from the O<sub>2</sub> measurement in the test tube. (4) This corrected mV signal was converted into  $\mu\text{mol O}_2 \text{ L}^{-1}$  using the original calibration equation.
