# Supplementary material
Source: MDPI journal article supplement (https://www.mdpi.com/2077-1312/5/4/46)
Supplement: s1 [file s1]

Archive with 4 entries (4 files):
- Supplement Data S1 Rcode outlier test and dataset.rar
- Supplement Data S2 Cell counts St.9 SISI.xlsx
- Supplement Note 1 Microelectrode temperature correction.pdf
- Supplement Video S1 Deployment and operation of the SISI.mp4
