# Supplementary material
Source: MDPI journal article supplement (https://www.mdpi.com/2077-1312/5/4/46)
Supplement: s1 [file s1 › Supplement Data S2 Cell counts St.9 SISI.xlsx]

## Sheet: Tabelle1
		Bacterial cell numbers [cells mL-1]		% increase/decrease
Sample	time point	Mean of duplicate measurements	CV (%)	compared to t(0)
SML	t (0)	624384	0.367921
SML	t (end)	867516	21.3159	28.0262
SML	t (end)	811130	5.68922	23.0229
1 m	t (0)	587335	3.24794
1 m light	t (end)	454660	2.81332	-29.1812
1 m dark	t (end)	532371	13.4356	-10.3244
5 m	t (0)	547492	2.08119
5m light	t (end)	460430	9.87492	-18.9089
5m dark	t (end)	450514	13.4903	-21.5259
Legend:
Explanation: We show the mean (n=2) and STD of measured bacterial cell counts per mL (via flow cytometry) derived from test tubes before and after the incubation using the SISI
SML= sea-surface microlayer
te= end of incubation
t0= beginning of incubation
FC=flow cytometry
CV=Coefficient of variation (%)
FC staining protocol according to Rahlff, J.; Stolle, C.; Giebel, H.A.; Brinkhoff, T.; Ribas-Ribas, M.; Hodapp, D.; Wurl, O. High wind speeds prevent formation of a distinct bacterioneuston community in the sea-surface microlayer. FEMS Microbiol. Ecol. 2017, 93, 10.1093/femsec/fix041
